# Supplementary material
Source: Royal Society of Chemistry journal article supplement (doi:10.1039/d6ay00682e)
Supplement: d6ay00682e1.pdf [file d6ay00682e1.pdf]

A Magnetic Separation-Based Dual-Mode Aptasensor Integrating FRET Fluorescence and  
UV Absorption for Early Diagnosis of Hepatocellular Carcinoma

Jianghua Wang<sup>1</sup>, Jianfeng Tang<sup>2\*</sup>

<sup>1</sup>Department of Hepatobiliary pancreatic and Gastrointestinal Surgery, Wuchang Hospital  
Affiliated to Wuhan University of Science and Technology, Wuhan 430063, P. R. China

<sup>2</sup>Xiangxing College, Hunan University of Chinese Medicine, Changsha, Hunan, China

\*Corresponding Author: Jianfeng Tang

Email: 2450265139@qq.com

## Reagents

All reagents were of analytical grade unless otherwise stated. NHS-magnetic beads, FAM-labeled aptamers (P1), SH-modified P2 chains, silver nitrate ( $\text{AgNO}_3$ ), sodium borohydride ( $\text{NaBH}_4$ ), trithiocyanuric acid (TSC), BHQ dye, HepG2 cells, A549 cells, MCF-7 cells, LNCaP cells, fetal bovine serum (FBS), phosphate-buffered saline (PBS, pH 7.4), and anhydrous ethanol were purchased from Sigma-Aldrich (St. Louis, MO, USA). Ultra-pure water ( $18.2 \text{ M}\Omega \cdot \text{cm}$ ) was used throughout the experiment.

## Instruments

The instruments used in the experiment included: UV-Vis spectrophotometer (UV-2600, Shimadzu, Japan), fluorescence spectrophotometer (F-7000, Hitachi, Japan), centrifuge (5810R, Eppendorf, Germany), magnetic stirrer (MS-H-Pro+, Dragon Lab, China), transmission electron microscope (TEM, JEM-2100, JEOL, Japan), ultra-pure water machine (Milli-Q, Merck, Germany), biosafety cabinet (BSC-1300IIA2, Haier, China), and cell incubator ( $\text{CO}_2$ -160, Memmert, Germany).

**Table S1** DNA sequences (5'-3') utilized in this work.

| Strand      | Sequence (5'-3')                                                                                      |
|-------------|-------------------------------------------------------------------------------------------------------|
| F1 (TLS11a) | $\text{NH}_2\text{-ACAGCATCCCCATGTGAACAATCGCATTGTGATTGTTACGGTTTC}$<br>$\text{CGCCTCATGGACGTGCTG-FAM}$ |
| F2          | $\text{BHQ-CAGCACGTCCATGAGGCG-SH}$                                                                    |

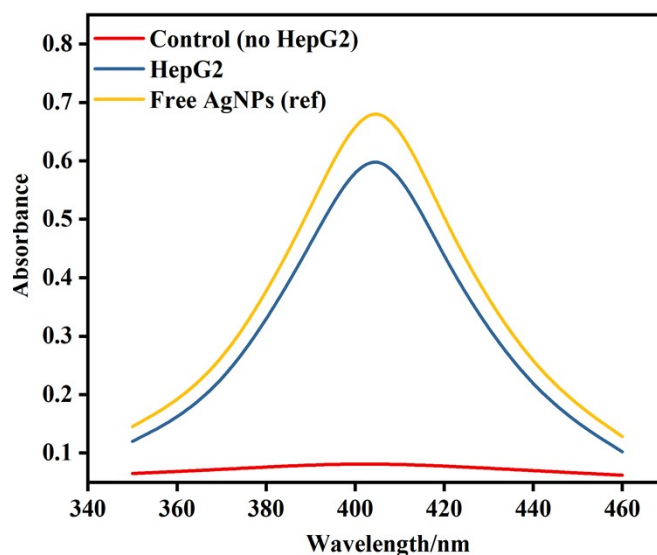

Figure S1. Direct validation of probe release efficiency. UV-Vis absorption spectra of supernatants collected after magnetic separation: control group without HepG2 cells (red), HepG2-treated group (blue), and free AgNPs reference (yellow).
